# Supplementary material for: Ultrahigh discharge efficiency and improved energy density in rationally designed bilayer polyetherimide–BaTiO3/P(VDF-HFP) composites
Source: Royal Society of Chemistry journal article supplement (doi:10.1039/d0ta00903b), 2020-01-01
Supplement: d0ta00903b1.pdf [file d0ta00903b1.pdf]

*Supporting Information for*

**Ultrahigh Discharge Efficiency and Improved Energy Density in  
Rationally Designed Bilayer Polyetherimide-BaTiO<sub>3</sub>/P(VDF-HFP)  
Composites**

Liang Sun<sup>a</sup>, Zhicheng Shi<sup>a,\*</sup>, Huanlei Wang<sup>a</sup>, Kun Zhang<sup>b,\*</sup>, Davoud Dastan<sup>c</sup>, Kai Sun<sup>d</sup>, Runhua Fan<sup>d</sup>

<sup>a</sup>School of Materials Science and Engineering, Ocean University of China, Qingdao 266100, P. R. China

<sup>b</sup>Key Laboratory of Microgravity (National Microgravity Laboratory), Institute of Mechanics, Chinese Academy of Sciences, Beijing 100190, China

<sup>c</sup>Department of Materials Science and Engineering, Georgia Institute of Technology, Atlanta, Georgia-30332, USA

<sup>d</sup>Institute of Marine Materials Science and Engineering, Shanghai Maritime University, Shanghai 201306, P. R. China

\*Corresponding author: Zhicheng Shi, Kun Zhang

\*E-mail: zcshi@ouc.edu.cn, zhangkun@imech.ac.cn

**Key words:** dielectric permittivity, polymer composite, discharged efficiency, bilayer structure, film capacitor.

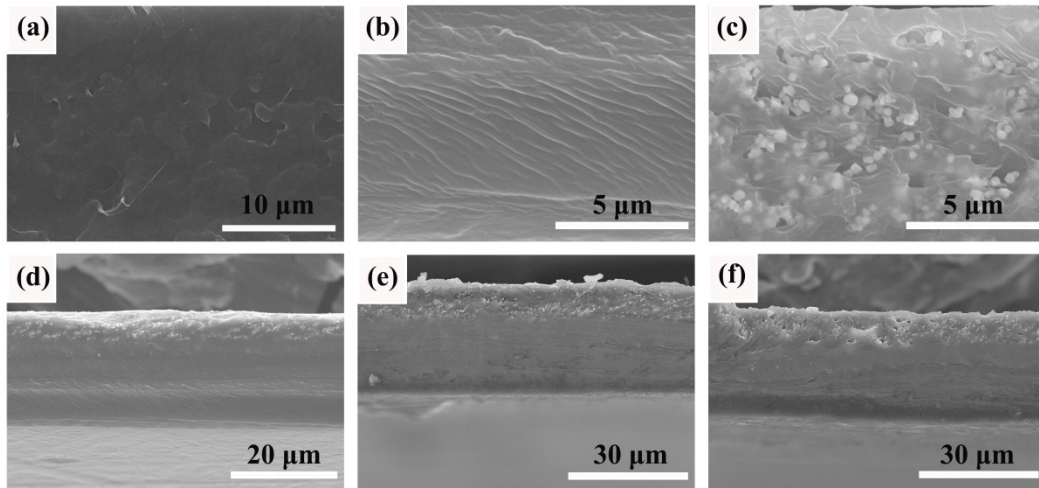

**Fig. S1.** (a-c) Cross-sectional SEM morphologies of pure PVDF, pure PEI and single-layer BaTiO<sub>3</sub>/PVDF and (d-f) cross-sectional SEM morphologies of the PEI-5 vol% BT/PVDF, PEI-10 vol% BT/PVDF and PEI-20 vol% BT/PVDF bilayer composites.

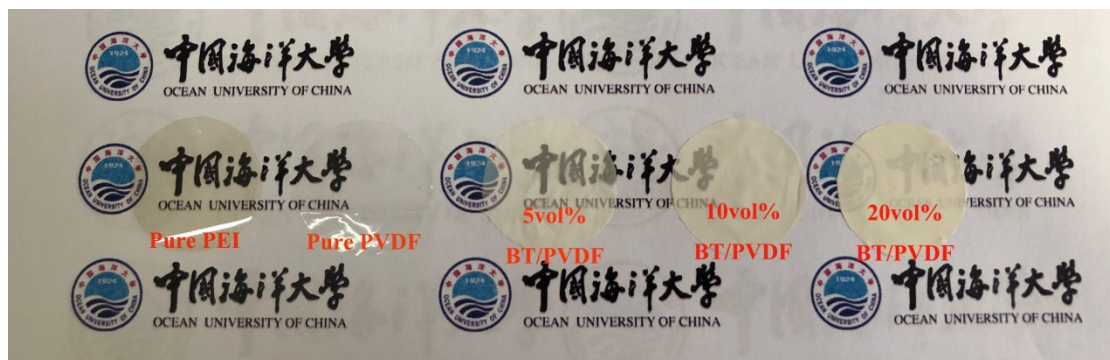

**Fig. S2.** Photograph of the single-layer films with different volume fractions of BaTiO<sub>3</sub>.

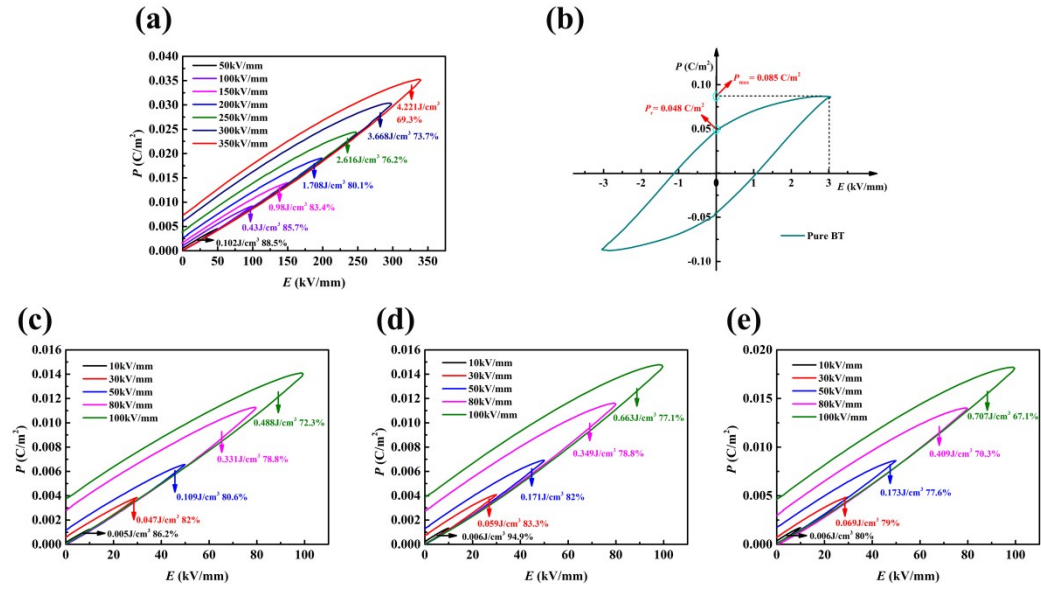

**Fig. S3.** (a)  $P$ - $E$  loops of pure PVDF layer; (b)  $P$ - $E$  loops of pure BT and (c-e) the single-layer BaTiO<sub>3</sub>/P(VDF-HFP) composites with 5 vol%, 10 vol% and 20 vol% content of BaTiO<sub>3</sub> at different electric fields.

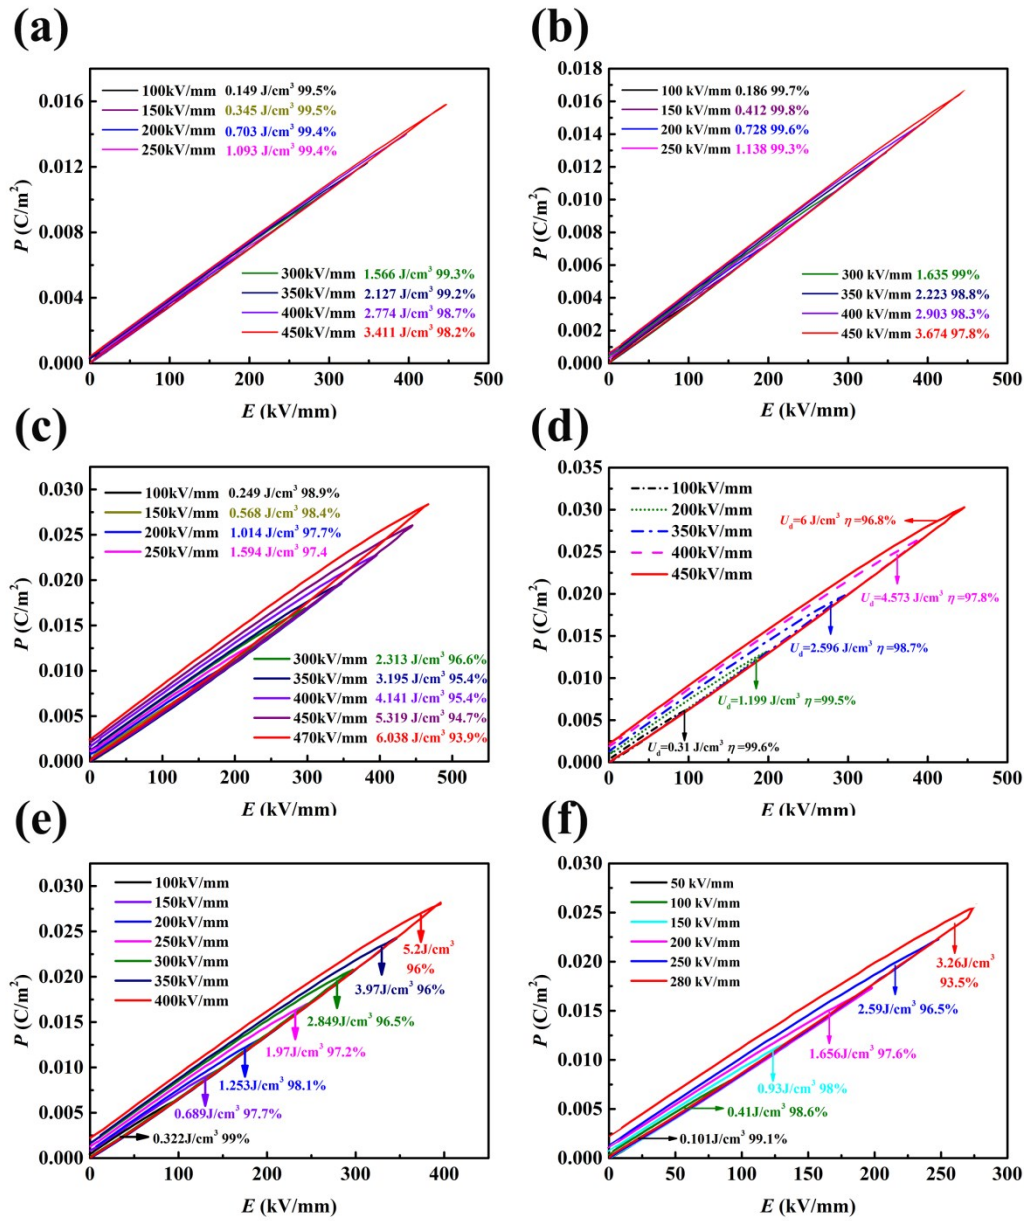

**Fig. S4.**  $P$ - $E$  loops of pure PEI layer and (b-f) the bilayer 0 vol% (pure PVDF), 5 vol%, 10 vol%, 20 vol% and 40 vol% PEI-BaTiO<sub>3</sub>/P(VDF-HFP) composites at varied electric fields.

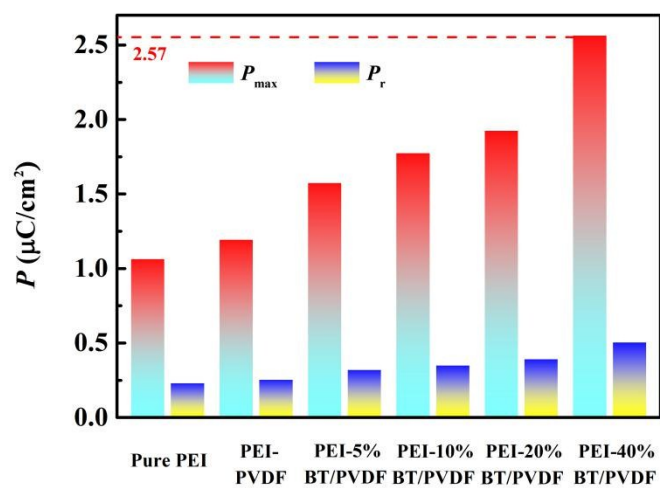

**Fig. S5.** The maximum displacement  $P_{\max}$  and remnant displacement  $P_r$  of the pure PEI and bilayer composites at 280 kV/mm.
